# Supplementary material for: Pathogenesis of Respiratory Syncytial Virus Infection in BALB/c Mice Differs Between Intratracheal and Intranasal Inoculation
Source: PubMed Central journal article supplement (PMC6631102; doi:10.3390/v11060508), 2019-06-03

# Sup Fig 1: Gating strategy cells from bronchoalveolar lavage

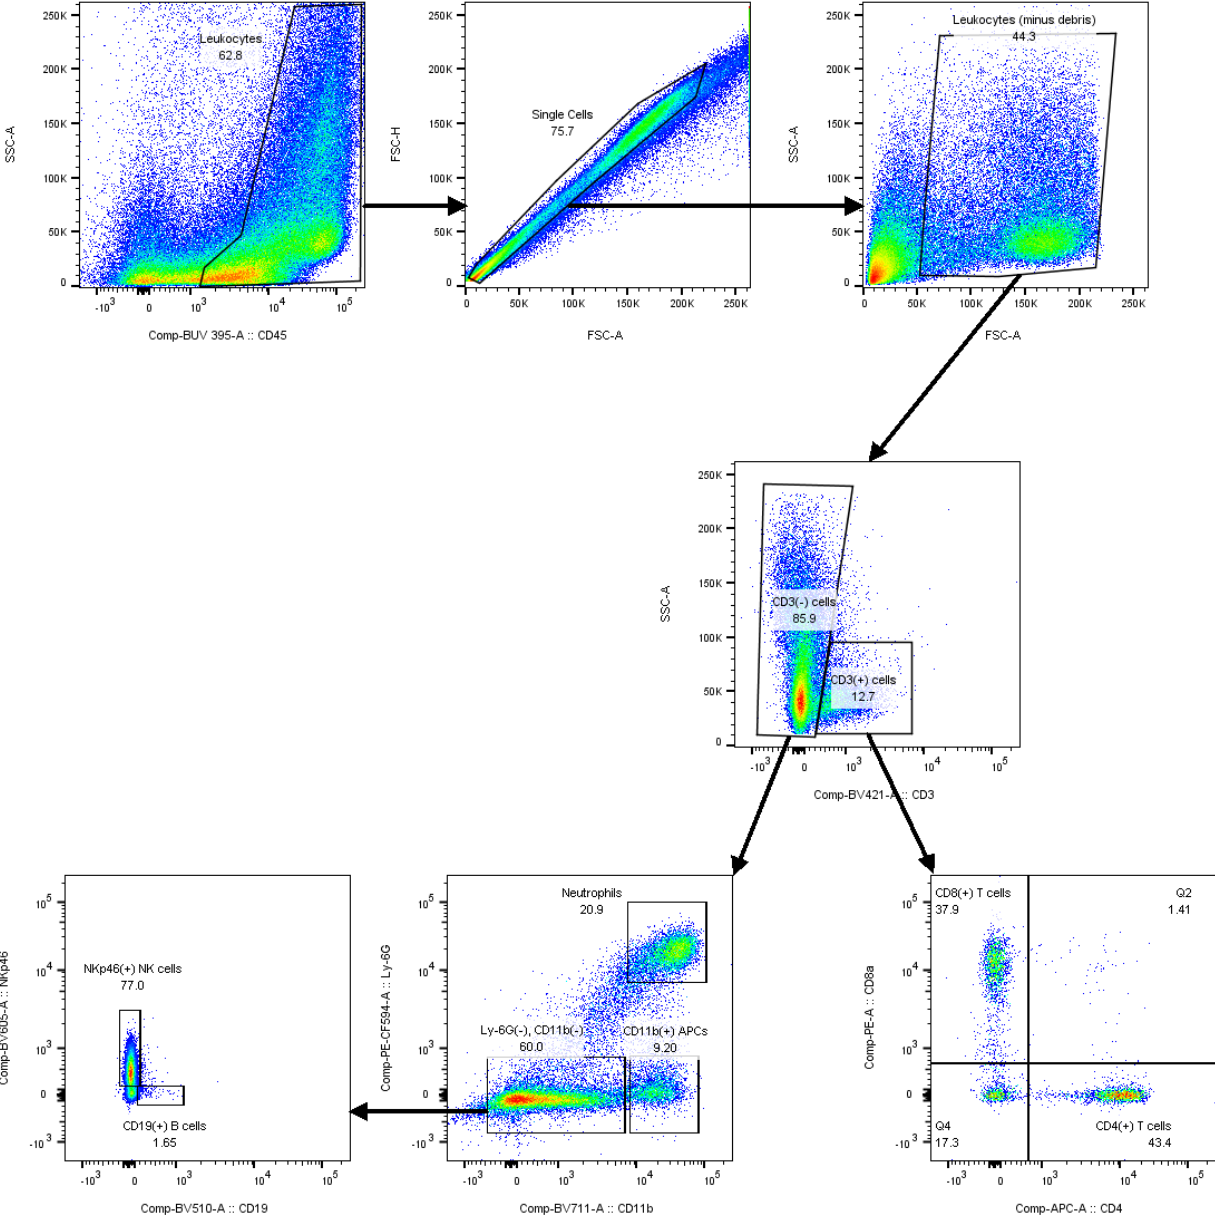

Supplement: viruses-11-00508-s001.pdf [file viruses-11-00508-s001.pdf]
